# Supplementary material
Source: Research Square preprint supplement (doi:10.21203/rs.3.rs-8628033/v1)
Supplement: Supplementary file 1 [file c3ee389d6748fb3ad681ec27.docx]

**Appendix 1: Data collection summary table**

| **Category** | **Data Collected (Source)** |
| --- | --- |
| **Demographics** | Age, Sex, BMI, comorbidities (ASA, WHO Performance Status, APU SORT v2 Score) (Epic & SORT v2 website) |
| **Oncology** | Cancer stage (III & IV), number of neoadjuvant cycles (NACT) Time to Adjuvant Chemotherapy (TTAC) (Epic) |
| **Prehabilitation** | Enrolment status, duration, No. of Appointments (Physiotherapy, Nutrition, Psychology, Anaesthetics, MDTs) (Epic) |
| **Surgical Data** | Type of surgery (CRS, IDS), Peritoneal cancer index score (PCI), Complete Cytoreduction Rate (Epic) |
| **Clinical Outcomes** | Postoperative complications (Clavien-Dindo Classification 30-days post discharge), Comprehensive Complication Index, Mortality 12 Months. (Epic) |
| **Hospital Stay** | Length of stay (LOS) hospital & ICU (Epic) |
| **Costs** | Prehabilitation program costs (Trust PLICS), hospitalisation costs (PLICS)  Telephone Encounters – 25% reduced as per NHS tariffs16 |

**Appendix 2: Modelled QALY Decrements Downey et al, 20236**

| Clavien–Dindo grade | Clinical description | QALY decrement (12 months) |
| --- | --- | --- |
| 0 | No postoperative complication | 0.000 |
| I | Minor deviation from normal postoperative course | 0.012 |
| II | Complication requiring pharmacological treatment | 0.026 |
| III | Complication requiring surgical, endoscopic or radiological intervention | 0.033 |
| IV | Life-threatening complication requiring ICU management | 0.086 |

**Appendix 4: Covariate Balance After Propensity Score Weighting**

| Covariate | Standardised Mean Difference (SMD) | Interpretation |
| --- | --- | --- |
| Age | 0.15 | Acceptable balance |
| ASA Score | 0.07 | Excellent balance |
| PCI (Disease Extent) | 0.01 | Excellent balance |
| SORT V2 score (Surgical Risk) | 0.03 | Excellent balance |

**Appendix 3: Clinical Outcomes Before and After Propensity Score Weighting**

| Outcome | PSW Analysis | MILE | Non-MILE | p-value |
| --- | --- | --- | --- | --- |
| CCI, median (IQR) | Before | 20.9 (0–29.6) | 29.6 (22.6–47.9) | <0.001 |
|  | After | 20.9 (0–29.6) | 29.6 (22.6–47.9) | 0.003 |
| Grade III–IV complications, % | Before | 13.5 | 36.1 | 0.03 |
|  | After | 13.9 | 33.6 | 0.038 |
| ICU LOS, median (IQR), days | Before | 1 (1–2.5) | 2 (1–3) | 0.02 |
|  | After | 1 (1–2) | 2 (1–3) | 0.01 |
| Hospital LOS, median (IQR), days | Before | 6 (4.5–9) | 8 (6–10) | 0.03 |
|  | After | 6 (4–9) | 8 (5–10) | 0.04 |
| 12-month mortality, % | Before | 13.5 | 11.0 | 1.0 |
|  | After | 14.5 | 10.8 | 0.63 |

**Appendix 5. Two-way deterministic sensitivity analysis**

Two-way deterministic sensitivity analysis varying per-patient prehabilitation program costs and hospital cost differences (Non-MILE – MILE) by ±30% around base-case values. Negative values indicate that the MILE program is cost-saving.

| Analysis | Hospital cost factor | Hospital cost difference (£) | Prehab cost factor | Prehab cost (£) | Incremental cost (£) |
| --- | --- | --- | --- | --- | --- |
| Mean | 0.7× | 5,720 | 0.7× | 1,144 | –4,575 |
| Mean | 0.7× | 5,720 | 1.0× | 1,635 | –4,085 |
| Mean | 0.7× | 5,720 | 1.3× | 2,126 | –3,594 |
| Mean | 1.0× | 8,171 | 0.7× | 1,144 | –7,026 |
| Mean | 1.0× | 8,171 | 1.0× | 1,635 | –6,536 |
| Mean | 1.0× | 8,171 | 1.3× | 2,126 | –6,046 |
| Mean | 1.3× | 10,622 | 0.7× | 1,144 | –9,478 |
| Mean | 1.3× | 10,622 | 1.0× | 1,635 | –8,987 |
| Mean | 1.3× | 10,622 | 1.3× | 2,126 | –8,497 |
| Median | 0.7× | 6,023 | 0.7× | 1,200 | –4,822 |
| Median | 0.7× | 6,023 | 1.0× | 1,715 | –4,308 |
| Median | 0.7× | 6,023 | 1.3× | 2,230 | –3,793 |
| Median | 1.0× | 8,604 | 0.7× | 1,200 | –7,404 |
| Median | 1.0× | 8,604 | 1.0× | 1,715 | –6,889 |
| Median | 1.0× | 8,604 | 1.3× | 2,230 | –6,374 |
| Median | 1.3× | 11,185 | 0.7× | 1,200 | –9,985 |
| Median | 1.3× | 11,185 | 1.0× | 1,715 | –9,470 |
| Median | 1.3× | 11,185 | 1.3× | 2,230 | –8,956 |

Notes: Hospital cost differences represent per-patient surgical admission costs including overheads (Non-MILE – MILE). Prehabilitation programme costs are per-patient costs. Both parameters were varied independently by ±30%.

**Appendix 6: Probabilistic Sensitivity Analysis for Net Monetary and Net Health Benefits.**

**Net Monetary Benefit**

| WTP λ (£/QALY) | Mean NMB (£) | 95% bootstrapped CI (£) |
| --- | --- | --- |
| 20,000 | **£6,810** | **£528 to £12,813** |
| 30,000 | **£6,973** | **£719 to £13,036** |
| 50,000 | **£7,368** | **£1,522 to £13,186** |

In probabilistic sensitivity analysis with 10,000 paired simulations of costs and QALYs, the mean incremental net monetary benefit of MILE versus standard care was approximately £6,800–7,400 per patient across willingness-to-pay thresholds of £20,000–£50,000 per QALY. The 95% bootstrapped Cis NMB remained entirely > zero at all thresholds confirming a high probability that MILE is cost-effective.

**Net Health Benefit**

| WTP λ (£/QALY) | Mean NHB (QALYs) | 95% bootstrapped CI (QALYs) | Approx. mean months gained* |
| --- | --- | --- | --- |
| 20,000 | **0.343** | **0.044 to 0.636** | ≈ **4.1 months** |
| 30,000 | **0.232** | **0.036 to 0.441** | ≈ **2.8 months** |
| 50,000 | **0.147** | **0.030 to 0.264** | ≈ **1.8 months** |

0.0833 QALY corresponds to approximately 1 month of full health, the estimated NHB of MILE remained positive across all conventional willingness-to-pay thresholds. The bootstrapped 95% confidence intervals for NHB were above zero, indicating that even under uncertainty in costs and QALY estimates, MILE almost always delivers a net health gain compared with standard care at typical NHS thresholds. Because the incremental cost (ΔCost) is negative and the incremental QALY gain (ΔQALY) is positive, both NMB and NHB are strictly positive for all thresholds considered, which in NICE decision-rule terms demonstrates that the MILE pathway is economically dominant over standard perioperative management.
